# Supplementary material for: Insights into Soil NO Emissions and the Contribution to Surface Ozone Formation in China
Source: Copernicus journal article supplement (doi:10.5194/egusphere-2023-990), 2023-06-05
Supplement: Supplementary file 1 [file egusphere-2023-990-supplement.pdf]

1 *Supplement of*  
2 **Insights into Soil NO Emissions and the Contribution to Surface**  
3 **Ozone Formation in China**

4

5 *Correspondence to:* Li Li (lily@shu.edu.cn)

6

7 **Content**

8 **Eq. S1 Temperature dependence factor**

9 **Table S1 Division of regions**

10 **Table S2 Statistical index formula**

11 **Table S3 Soil NO emissions\* and ratio of soil NO to anthropogenic NO<sub>x</sub> by different**  
12 **regions in China for 2018**

13 **Table S4 Comparison of soil NO emissions and flux in China reported by previous**  
14 **studies**

15 **Table S5 Comparison of observed and simulated values in China and five key regions**

16 **Figure S1 Anthropogenic NO<sub>x</sub> emissions and nitrogen fertilizer application during**  
17 **2010-2017 (Note: anthropogenic NO<sub>x</sub> emissions are based on MEIC emission inventory;**  
18 **nitrogen fertilizer data from provincial statistical yearbook)**

19 **Figure S2 Monthly soil NO emissions (estimated with default temperature dependence**  
20 **factor of 0.103) by region**

21 **Figure S3 Soil NO emissions estimated using different fertilizer data (default fertilizer**  
22 **data: International Fertilizer Industry Association from Potter et al. (2010) for year**  
23 **2010; nitrogen fertilizer and compound fertilizer are from statistical yearbooks at the**  
24 **provincial level for year 2018)**

25 **Figure S4 Scatter plot of monthly mean NO<sub>2</sub> concentration (before and after adjusting**  
26 ***k*)**

27 **Figure S5 Scatter plot of monthly mean MDA8 ozone concentration (before and after**  
28 **adjusting *k*)**

29 **Figure S6 Comparison of OSAT method and Brute force method in China and five key**  
30 **regions**

31 **Figure S7 Ozone differences between OSAT method and brute force method under**  
32 **different ozone concentrations in China and five key regions**

33 **Figure S8 Spatial distribution of ozone contribution from different source groups based**  
34 **on OSAT results**

35 **Figure S9 Relative ozone contribution by emission groups and region**

36 **Figure S10 Area exposed to MDA8 > 160 μg/m<sup>3</sup> under different soil NO emission**  
37 **reduction scenarios (PRD is not shown because MDA8 ozone concentration is less than**  
38 **160 μg/m<sup>3</sup>)**

39 **Figure S11 Population exposed to MDA8 > 160 μg/m<sup>3</sup> under different soil NO emission**  
40 **reduction scenarios (PRD is not shown because MDA8 ozone concentration is less than**  
41 **160 μg/m<sup>3</sup>)**

**Temperature dependence factor**

$$f(T) = e^{k[{}^{\circ}\text{C}^{-1}]T} \quad k = 0.103 \pm 0.04$$

Eq. S1

**Table S1 Division of regions**

| Region          | Provinces                                                     |
|-----------------|---------------------------------------------------------------|
| Northeast China | Liaoning, Heilongjiang, Jilin                                 |
| North China     | Hebei, Inner Mongolia, Tianjin, Beijing, Shanxi               |
| Central China   | Henan, Hubei, Hunan                                           |
| East China      | Fujian, Jiangsu, Shandong, Zhejiang, Shanghai, Anhui, Jiangxi |
| South China     | Hainan, Guangdong, Guangxi                                    |
| Southwest China | Tibet, Sichuan, Yunnan, Chongqing, Guizhou                    |
| Northwest China | Xinjiang, Qinghai, Gansu, Ningxia and Shaanxi                 |

**Table S2 Statistical index formula**

| No. | Index                               | Formula                                                                                                          | Note                                  |
|-----|-------------------------------------|------------------------------------------------------------------------------------------------------------------|---------------------------------------|
| 1   | Pearson correlation coefficient (R) | $\frac{\sum[(P_j - \bar{P}) \times (O_j - \bar{O})]}{\sqrt{\sum(P_j - \bar{P})^2 \times \sum(O_j - \bar{O})^2}}$ | Unitless, $-1 \leq R \leq 1$          |
| 2   | mean bias (MB)                      | $\frac{\sum(P_j - O_j)}{N}$                                                                                      | concentration unit                    |
| 3   | root-mean-square error (RMSE)       | $\sqrt{\frac{\sum(P_j - O_j)^2}{N}}$                                                                             | concentration unit                    |
| 4   | normalized mean bias (NMB)          | $\frac{\sum(P_j - O_j)}{\sum O_j} \times 100$                                                                    | $-100\% \leq \text{NMB} \leq +\infty$ |
| 5   | normalized mean error (NME)         | $\frac{\sum P_j - O_j }{\sum O_j} \times 100$                                                                    | $0\% \leq \text{NME} \leq +\infty$    |

**Table S3 Soil NO emissions\* and ratio of soil NO to anthropogenic NOx by different regions in China for 2018**

| Region          | Annual Soil NO emissions (Gg) | Soil NO emissions during June-August (Ratio of annual totals) | Ratio of soil NO/anthropogenic NOx | Ratio soil NO/anthropogenic NOx (June-August) |
|-----------------|-------------------------------|---------------------------------------------------------------|------------------------------------|-----------------------------------------------|
| Northeast China | 94.2                          | 63.7 (67.6%)                                                  | 12.0%                              | 36.0%                                         |
| North China     | 200.5                         | 118.1 (58.9%)                                                 | 14.9%                              | 36.5%                                         |
| Central China   | 281.4                         | 146.7 (52.1%)                                                 | 35.3%                              | 74.0%                                         |
| East China      | 264.3                         | 138.4 (52.4%)                                                 | 12.8%                              | 26.8%                                         |
| South China     | 71.4                          | 20.1 (28.2%)                                                  | 14.3%                              | 15.8%                                         |
| Southwest China | 87.6                          | 34.8 (39.7%)                                                  | 14.5%                              | 23.9%                                         |
| Northwest China | 158.4                         | 95.8 (60.5%)                                                  | 26.8%                              | 67.5%                                         |
| Total           | 1157.9                        | 63.7 (53.3%)                                                  | 12.0%                              | 36.0%                                         |

\*Soil NO emissions given in this table are based on the default temperature dependence factor.

**Table S4 Comparison of soil NO emissions and flux in China reported by previous studies**

| Reference          | Region | Reference year | Above canopy (Gg N a <sup>-1</sup> ) | Soil NOx flux (ng N m <sup>-2</sup> s <sup>-1</sup> )                                                                                                                       | Notes                                                     |
|--------------------|--------|----------------|--------------------------------------|-----------------------------------------------------------------------------------------------------------------------------------------------------------------------------|-----------------------------------------------------------|
| Wang et al. (2005) | China  | 1999           | 657                                  | generally more than 40 ng N m <sup>-2</sup> s <sup>-1</sup> (in the North China Plain in July) and 20 ng N m <sup>-2</sup> s <sup>-1</sup> (in the northeast China in July) | An empirical modeling approach of Yienger and Levy (YL95) |

|                     |            |                |                                       |                                                                                                                                                                   |
|---------------------|------------|----------------|---------------------------------------|-------------------------------------------------------------------------------------------------------------------------------------------------------------------|
| Tie et al. (2006)   | China      | 2004           | 1375                                  | Dynamical and biogenic emissions models, soil emissions parameterized with an exponential dependence on soil temperature.                                         |
| Yan et al. (2005)   | China      |                | 480                                   | Statistical model based on field measurements of NO <sub>x</sub> fluxes combined with land cover, soil pH, soil organic carbon, climate, and nitrogen fertilizers |
| Huang and Li (2014) | China      |                | 1226 (ranging from 588.24 to 2132.05) | Synthesis of 130 NO emissions sampling points at 14 locations to estimate soil NO emissions inventory in China.                                                   |
| Lu et al. (2019)    | China      | 2016 (Mar-Oct) | 1140                                  | BDSNP scheme in GEOS-Chem                                                                                                                                         |
|                     |            | 2017 (Mar-Oct) | 1360                                  |                                                                                                                                                                   |
| Lu et al. (2021)    | China      | 2017           | 770±40                                | BDSNP scheme in GEOS-Chem                                                                                                                                         |
| Wang et al. (2007)  | East China | 1997-1999      | 850                                   | Application of YL95 scheme in GEOS-Chem                                                                                                                           |
| Lin (2012)          | East China | 2006           | 380                                   | Top-down estimates using satellite NO <sub>2</sub> retrievals                                                                                                     |
| Wang et al. (2022)  | The North  | 2020           | 10-40 (crop growing season)           | Application of MEGAN scheme in WRF-Chem                                                                                                                           |

|                    |                       |           |                          |                                                                                                        |                                                                                                                 |
|--------------------|-----------------------|-----------|--------------------------|--------------------------------------------------------------------------------------------------------|-----------------------------------------------------------------------------------------------------------------|
|                    | China plain           |           |                          |                                                                                                        |                                                                                                                 |
| Li and Wang (2007) | the Pearl River Delta | 2005      |                          | The average is 47.5 (typical vegetable plot)                                                           | NO flux measured by static chamber technique in the suburbs of Guangzhou                                        |
| Li et al. (2007)   | South China           | 2005      |                          | The average fluxes of broadleaved forest and pine-leaved forest in the rainy season were 14.9 and 17.1 | Sample plots circled in the forest and NO fluxes measured by dynamic flow chamber technique                     |
| Liu et al. (2011)  | Northern China        | 2007-2009 |                          | Average annual flux of 7.6 (wheat-maize rural)                                                         | Experiments NO fluxes were obtained based on automatic measurement systems and intermittent manual measurements |
| Liu et al. (2017)  |                       |           |                          | The average soil NO flux was 12.9<br>Vegetable farmland flux is 30.9                                   | Synthesized 520 field observations from 114 publications                                                        |
|                    |                       |           | 805.2                    | 6.6 (June average, same below)                                                                         | BDSNP scheme (default fertilizer data)                                                                          |
|                    | China                 | 2018      | 1157.9<br>(715.7-1902.6) | 9.9                                                                                                    | BDSNP scheme (N + compound fertilizer data)                                                                     |
| This study         |                       |           | 296.1                    | 38.5                                                                                                   | BDSNP scheme (default fertilizer data)                                                                          |
|                    | NCP                   | 2018      | 455.9<br>(276.5-762.1)   | 60.1                                                                                                   | BDSNP scheme (N + compound fertilizer data)                                                                     |
|                    |                       |           |                          | 35.4                                                                                                   | BDSNP scheme (N + compound fertilizer data and adjusted $\beta$ value)                                          |

**Table S5 Comparison of observed and simulated values in China and five key regions**

|                                  | <b>China</b> | <b>NCP</b> | <b>YRD</b> | <b>PRD</b> | <b>Sichuan Basin</b> | <b>Northeast</b> |
|----------------------------------|--------------|------------|------------|------------|----------------------|------------------|
| OBS ( $\mu\text{g}/\text{m}^3$ ) | 129.6        | 172.4      | 146.5      | 97.5       | 108.3                | 126.1            |
| MOD ( $\mu\text{g}/\text{m}^3$ ) | 146.7        | 185.7      | 171.5      | 108.4      | 146.7                | 128.4            |
| MB ( $\mu\text{g}/\text{m}^3$ )  | 17.1         | 13.3       | 25.0       | 10.9       | 38.5                 | 2.4              |
| NMB (%)                          | 13.2         | 7.7        | 17.1       | 11.2       | 35.5                 | 1.9              |
| R                                | 0.89         | 0.77       | 0.80       | 0.58       | 0.62                 | 0.83             |

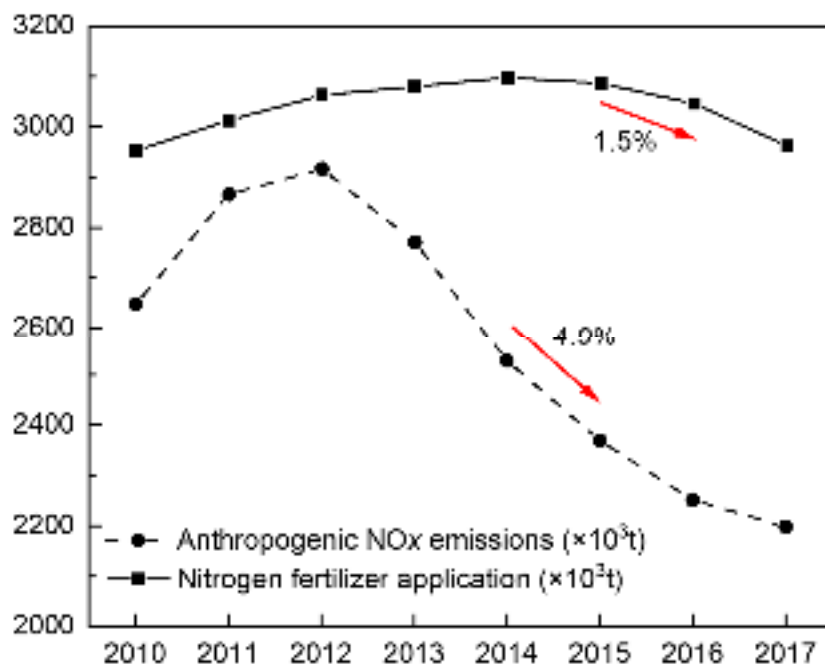

**Figure S1 Anthropogenic NOx emissions and nitrogen fertilizer application during 2010-2017 (Note: anthropogenic NOx emissions are based on MEIC emission inventory; nitrogen fertilizer data from provincial statistical yearbook)**

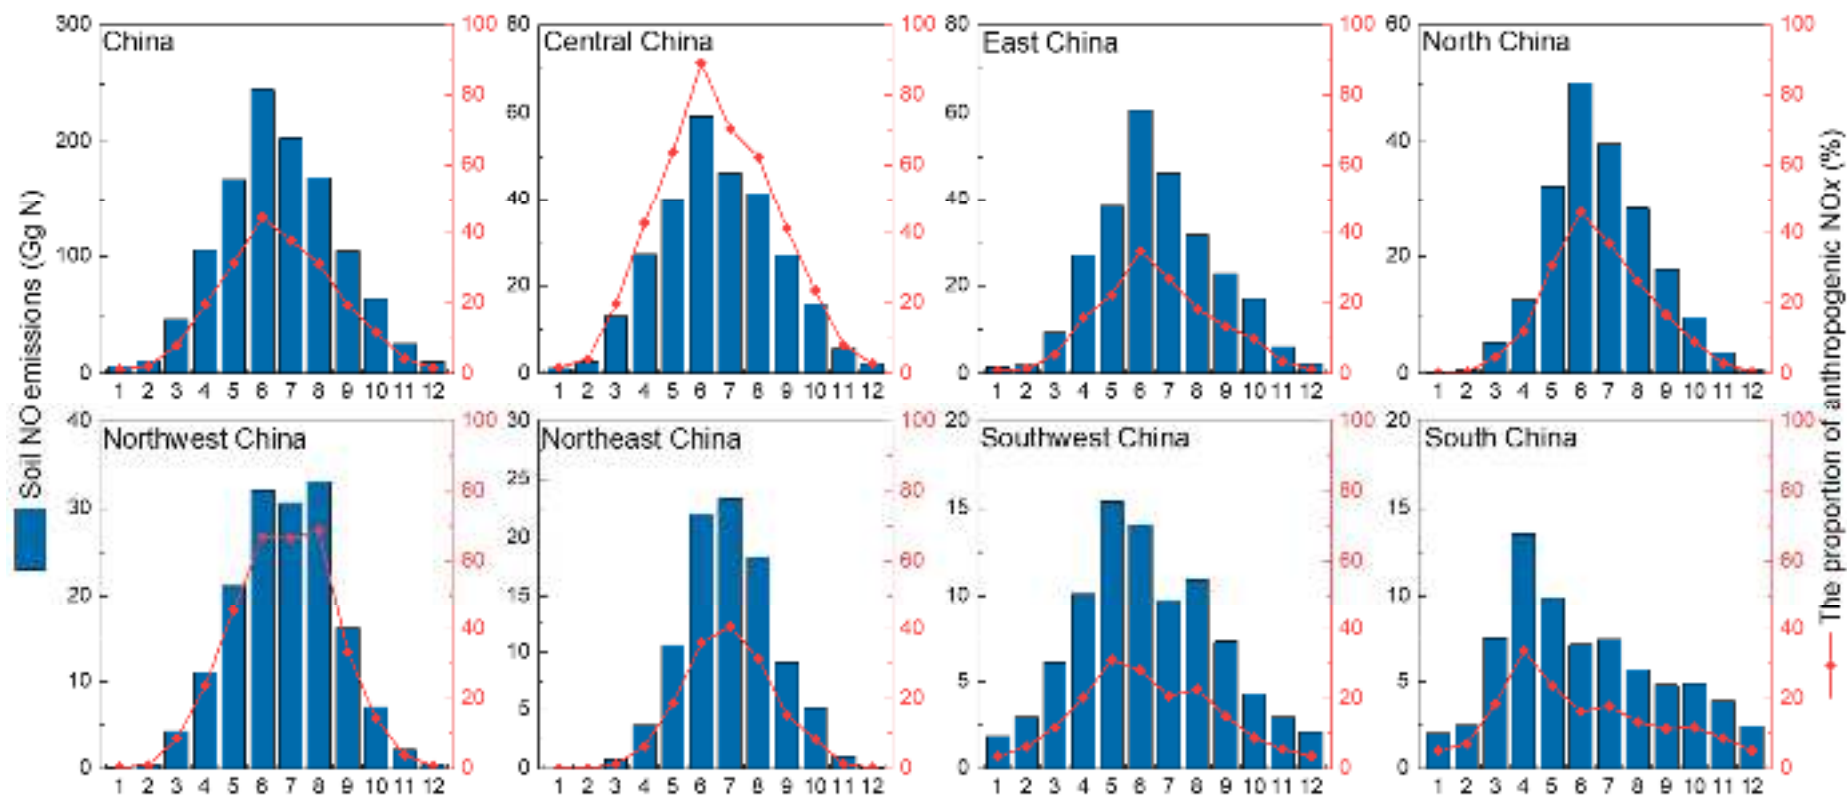

Figure S2 Monthly soil NO emissions (estimated with default temperature dependence factor of 0.103) by region



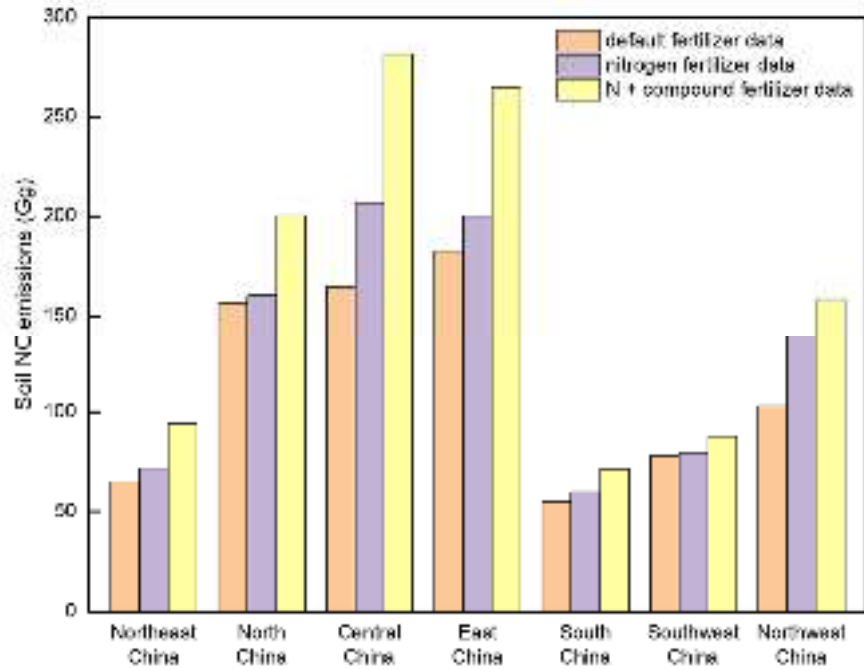

Figure S3 Soil NO emissions estimated using different fertilizer data (default fertilizer data: International Fertilizer Industry Association from Potter et al. (2010) for year 2010; nitrogen fertilizer and compound fertilizer are from statistical yearbooks at the provincial level for year 2018)

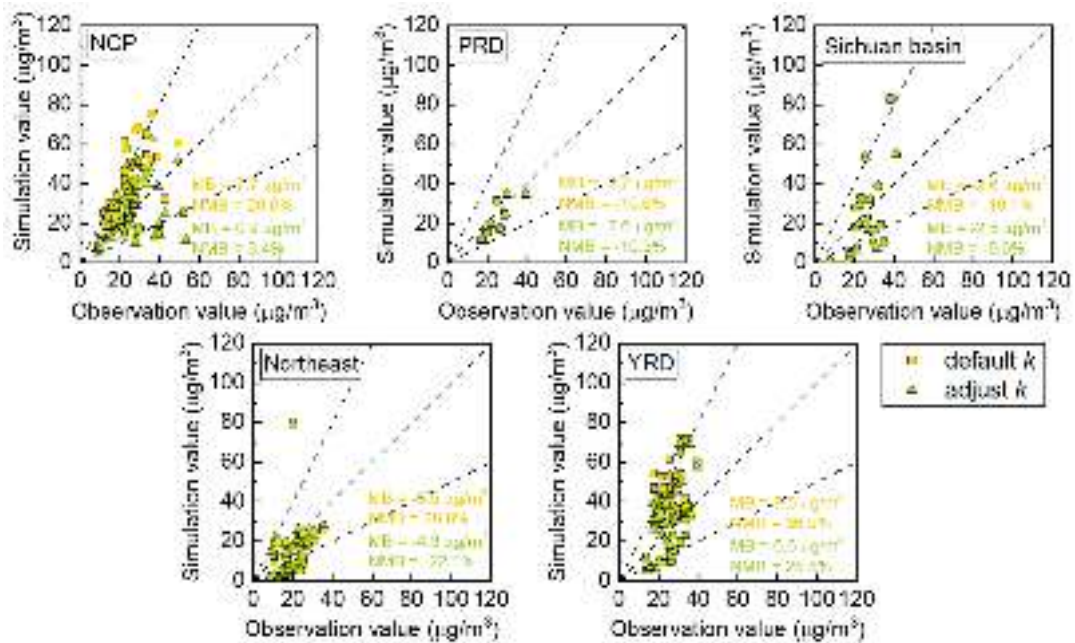

Figure S4 Scatter plot of monthly mean NO<sub>2</sub> concentration (before and after adjusting *k*)

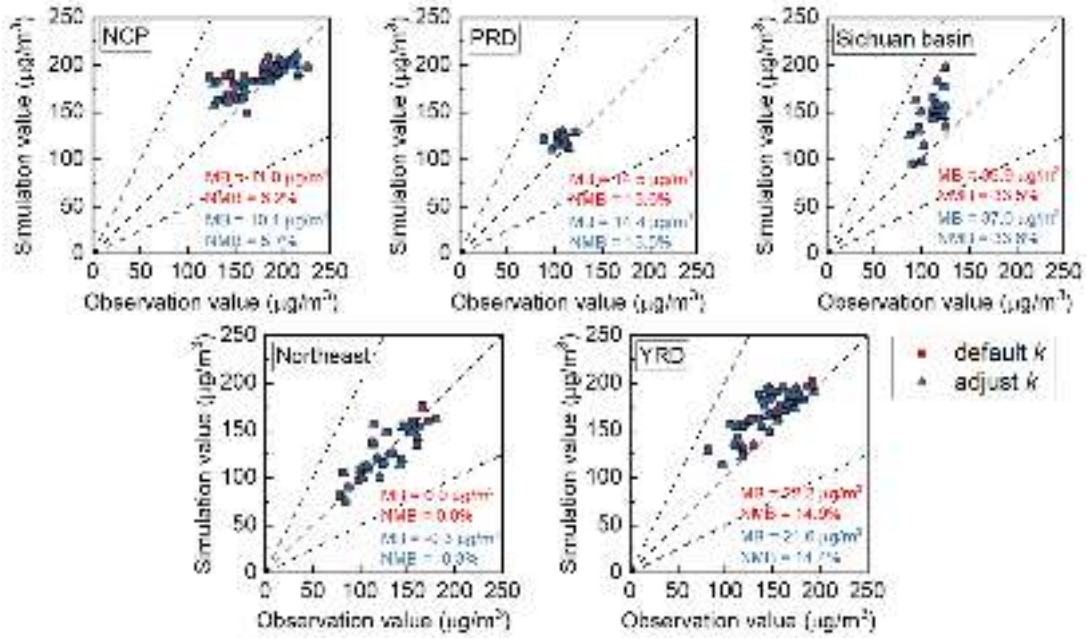

Figure S5 Scatter plot of monthly mean MDA8 ozone concentration (before and after adjusting  $k$ )

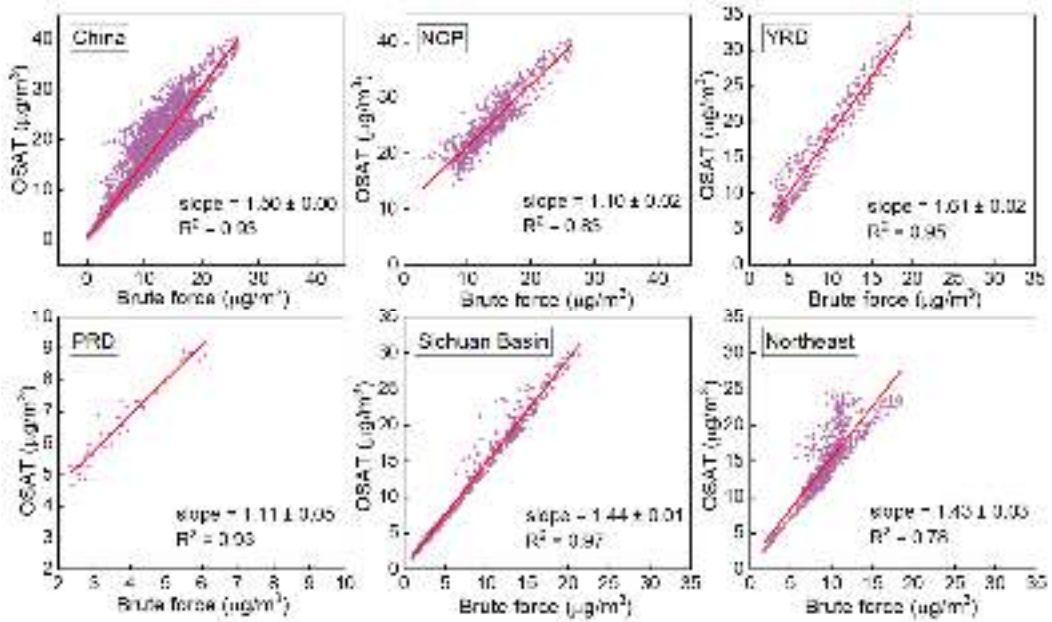

Figure S6 Comparison of OSAT method and Brute force method in China and five key regions

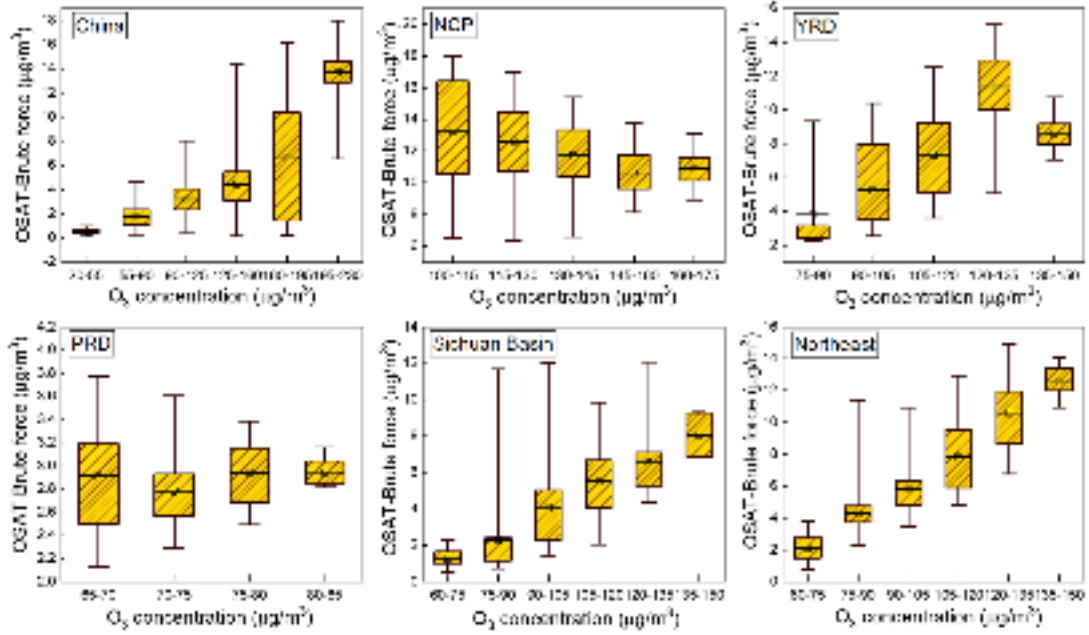

Figure S7 Ozone differences between OSAT method and brute force method under different ozone concentrations in China and five key regions

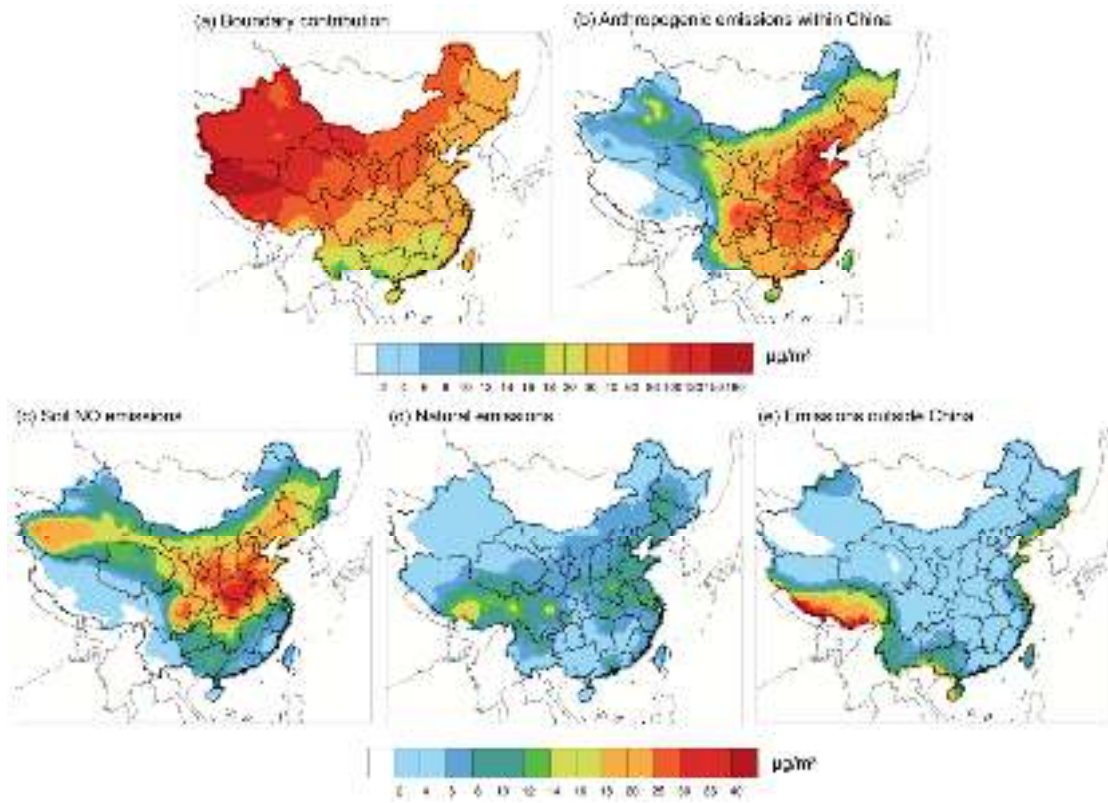

Figure S8 Spatial distribution of ozone contribution from different source groups based on OSAT results

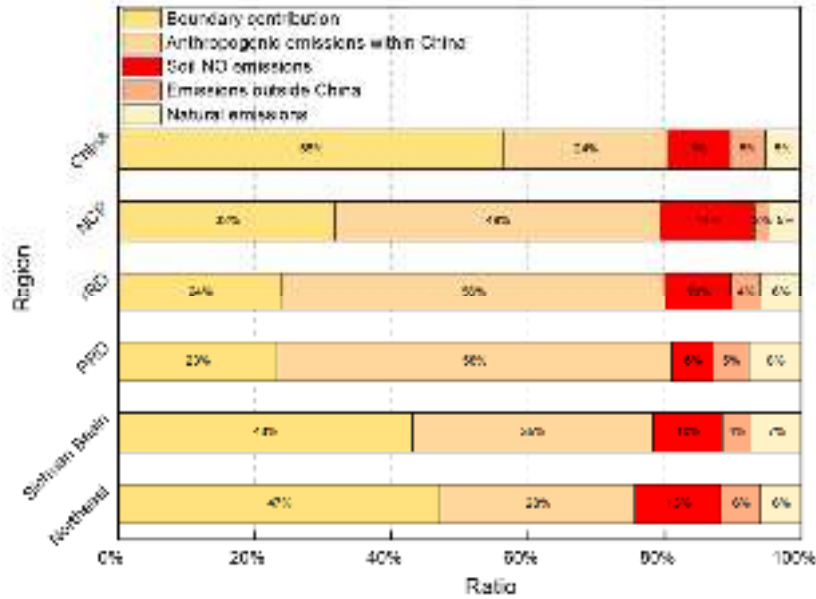

Figure S9 Relative ozone contribution by emission groups and regions

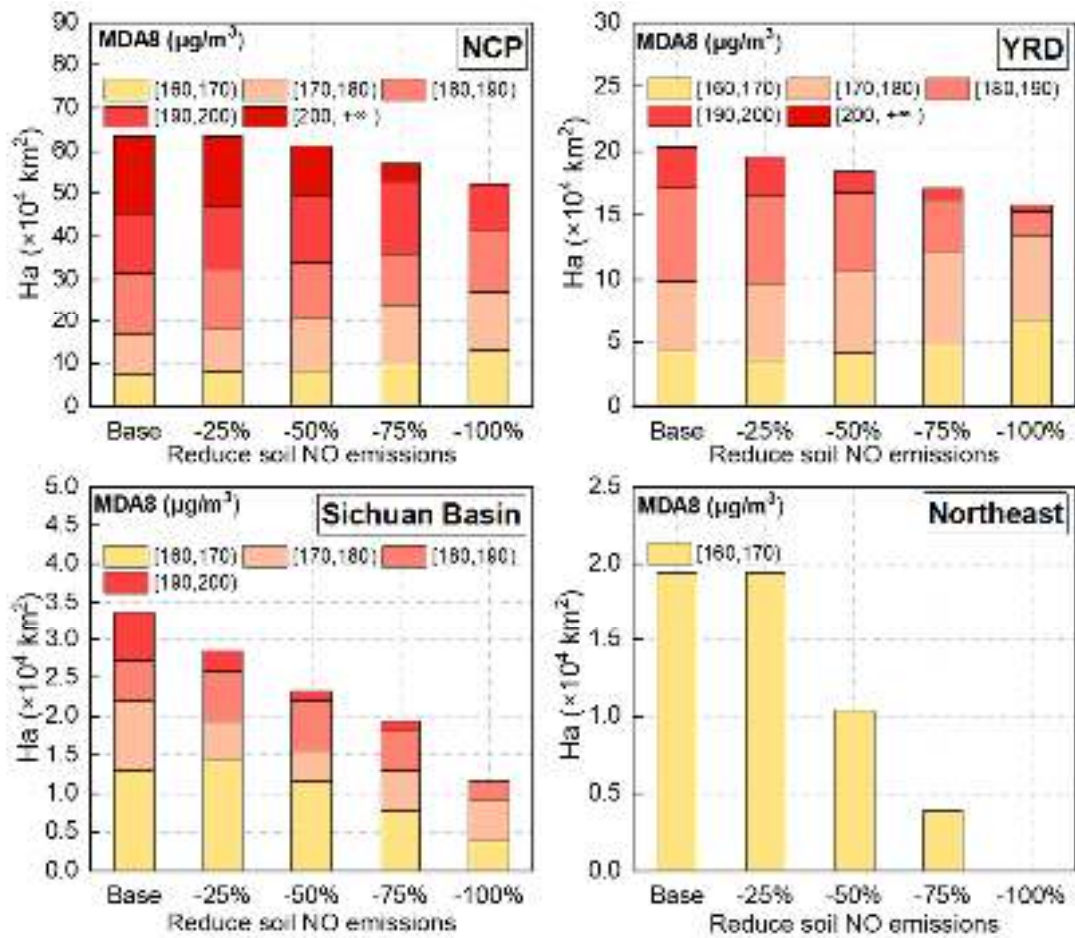

Figure S10 Area exposed to MDA8 > 160 µg/m<sup>3</sup> under different soil NO emission reduction scenarios (PRD is not shown because MDA8 ozone concentration is less than 160 µg/m<sup>3</sup>)



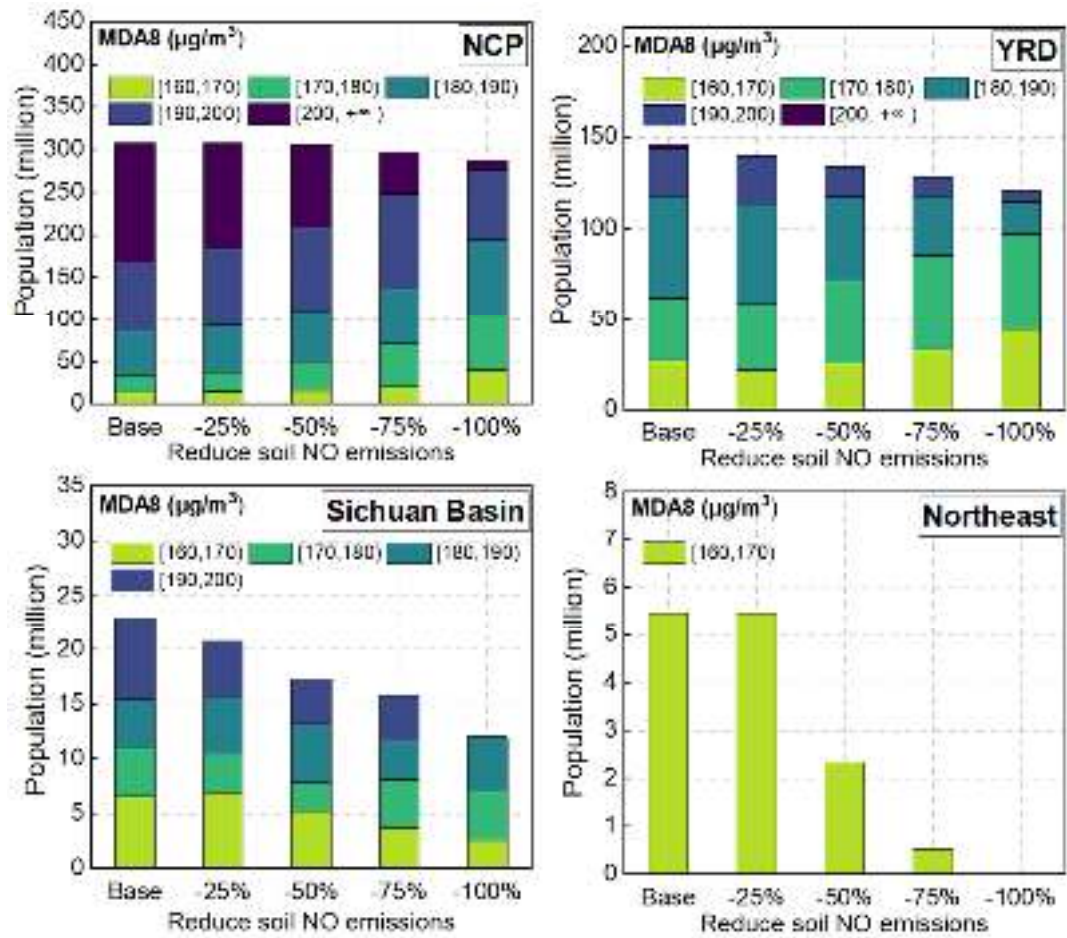

Figure S11 Population exposed to MDA8 > 160 µg/m<sup>3</sup> under different soil NO emission reduction scenarios (PRD is not shown because MDA8 ozone concentration is less than 160 µg/m<sup>3</sup>)

## Supplementary Information References

- Huang, Y.; Li, D. Soil nitric oxide emissions from terrestrial ecosystems in China: a synthesis of modeling and measurements. *Scientific Reports* 2014;4:1-8
- Li, D.; Wang, X. Nitric oxide emission from a typical vegetable field in the Pearl River Delta, China. *Atmospheric Environment* 2007;41:9498-9505
- Li, D.; Wang, X.; Mo, J.; Sheng, G.; Fu, J. Soil nitric oxide emissions from two subtropical humid forests in south China. *Journal of Geophysical Research: Atmospheres* 2007;112
- Lin, J.-T. Satellite constraint for emissions of nitrogen oxides from anthropogenic, lightning and soil sources over East China on a high-resolution grid. *Atmospheric Chemistry and Physics* 2012;12:2881-2898
- Liu, C.; Wang, K.; Meng, S.; Zheng, X.; Zhou, Z.; Han, S.; Chen, D.; Yang, Z. Effects of irrigation, fertilization and crop straw management on nitrous oxide and nitric oxide emissions from a wheat–maize rotation field in northern China. *Agriculture, Ecosystems & Environment* 2011;140:226-233
- Liu, S.; Lin, F.; Wu, S.; Ji, C.; Sun, Y.; Jin, Y.; Li, S.; Li, Z.; Zou, J. A meta-analysis of fertilizer-induced soil NO and combined NO+ N2O emissions. *Global Change Biology* 2017;23:2520-2532
- Lu, X.; Ye, X.; Zhou, M.; Zhao, Y.; Weng, H.; Kong, H.; Li, K.; Gao, M.; Zheng, B.; Lin, J. The underappreciated role of agricultural soil nitrogen oxide emissions in ozone pollution regulation in North China. *Nature communications* 2021;12:5021
- Lu, X.; Zhang, L.; Chen, Y.; Zhou, M.; Zheng, B.; Li, K.; Liu, Y.; Lin, J.; Fu, T.-M.; Zhang, Q. Exploring 2016–2017 surface ozone pollution over China: source contributions and meteorological influences. *Atmospheric Chemistry and Physics* 2019;19:8339-8361
- Potter, P.; Ramankutty, N.; Bennett, E.M.; Donner, S.D. Characterizing the spatial patterns of global fertilizer application and manure production. *Earth interactions* 2010;14:1-22
- Tie, X.; Li, G.; Ying, Z.; Guenther, A.; Madronich, S. Biogenic emissions of isoprenoids and NO in China and comparison to anthropogenic emissions. *Science of the total environment* 2006;371:238-251
- Wang, Q.g.; Han, Z.; Higano, Y. An inventory of nitric oxide emissions from soils in China. *Environmental pollution* 2005;135:83-90
- Wang, R.; Bei, N.; Wu, J.; Li, X.; Liu, S.; Yu, J.; Jiang, Q.; Tie, X.; Li, G. Cropland nitrogen dioxide emissions and effects on the ozone pollution in the North China plain. *Environmental Pollution* 2022;294:118617
- Wang, Y.; McElroy, M.B.; Martin, R.V.; Streets, D.G.; Zhang, Q.; Fu, T.M. Seasonal variability of NOx emissions over east China constrained by satellite observations: Implications for combustion and microbial sources. *Journal of Geophysical Research: Atmospheres* 2007;112
- Yan, X.; Ohara, T.; Akimoto, H. Statistical modeling of global soil NOx emissions. *Global Biogeochemical Cycles* 2005;19
